# Supplementary material for: Meldrum's acid mediated ketene chemistry in the formation of ester bonds for the synthesis of vitrimers with high glass transition temperatures
Source: Royal Society of Chemistry journal article supplement (doi:10.1039/d2py01559e), 2023-01-01
Supplement: d2py01559e1.pdf [file d2py01559e1.pdf]

## Electronic supplementary information (ESI) for

### Meldrum's acid mediated ketene chemistry in formation of ester bonds for synthesis of vitrimers with high glass transition temperatures

Du-Yuan Hung and Ying-Ling Liu\*

Department of Chemical Engineering, National Tsing Hua University, No. 101, Sec. 2, Kuang-Fu Road, Hsinchu 300044, Taiwan.

\* Corresponding author, E-mail: liuyl@mx.nthu.edu.tw

#### (a) FTIR

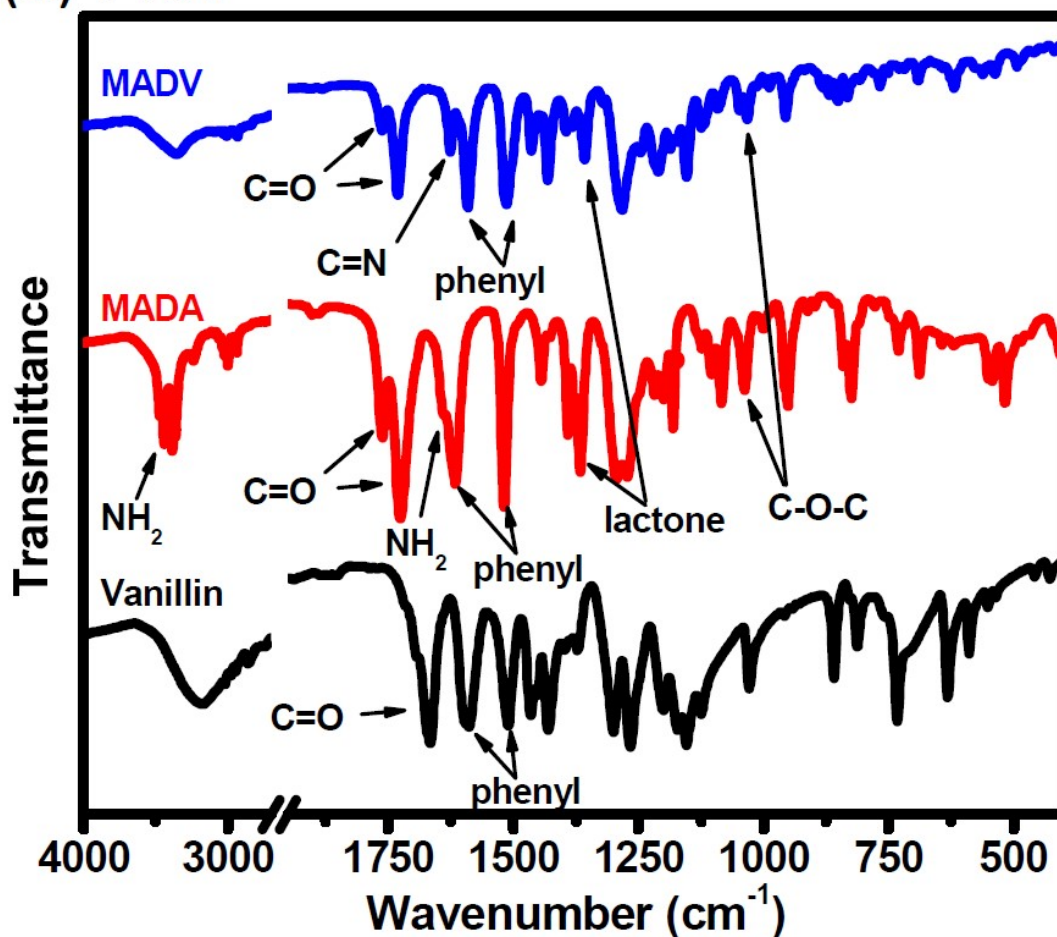

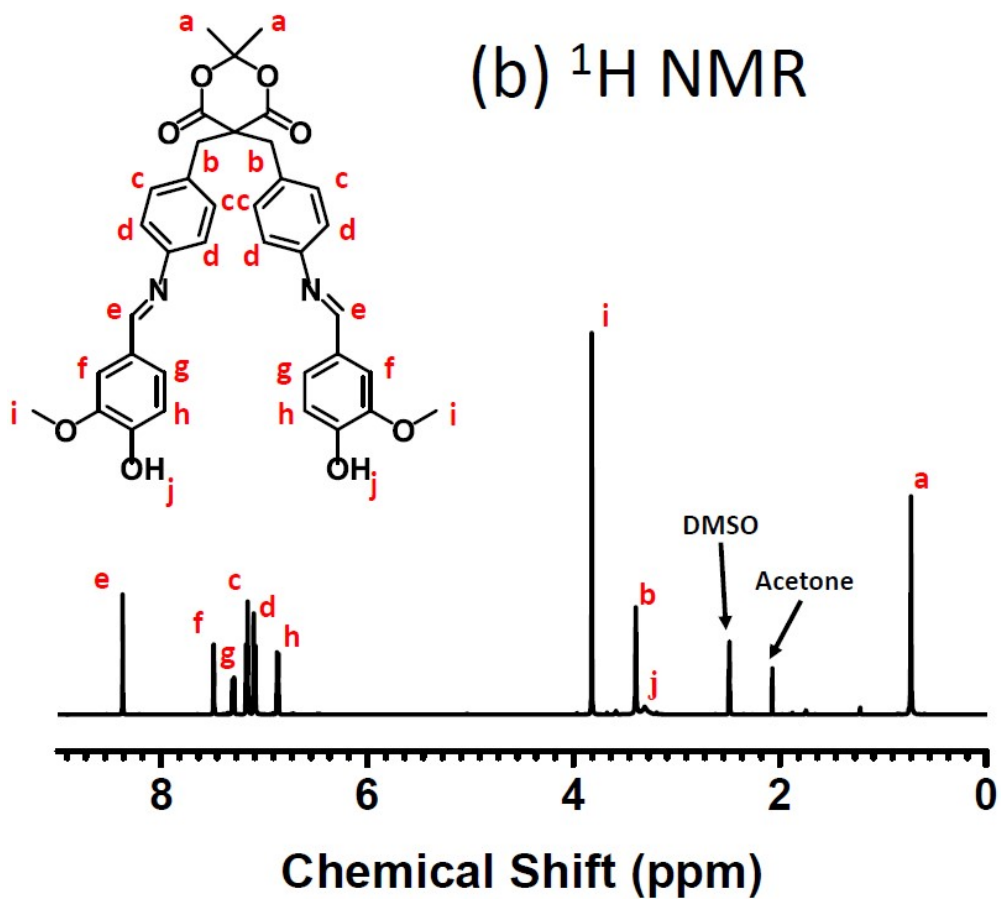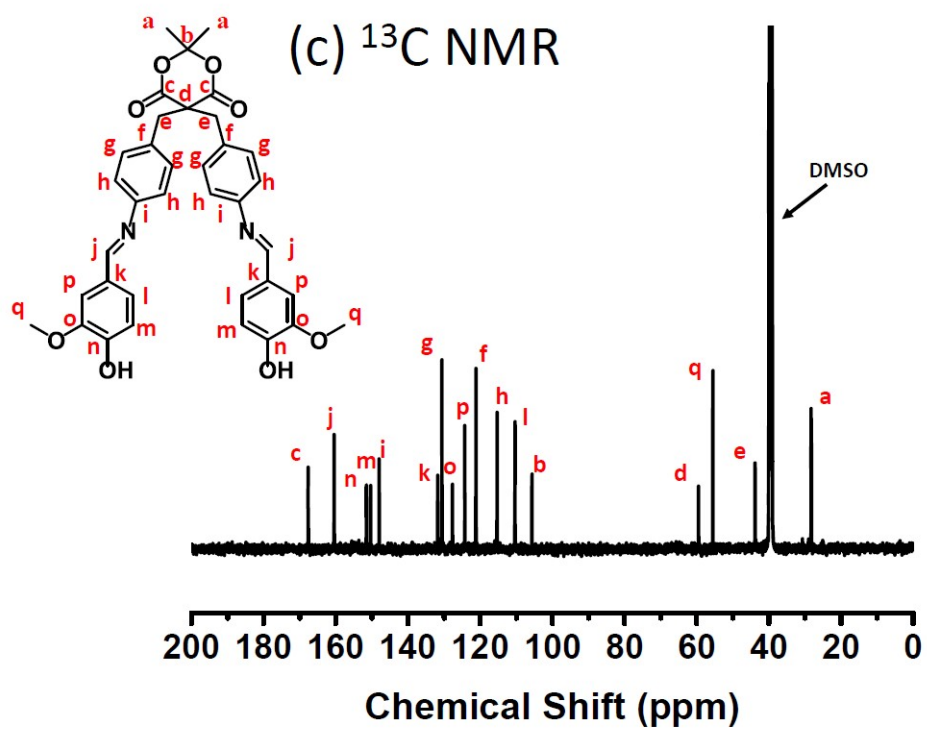

## (d) Molecular mass

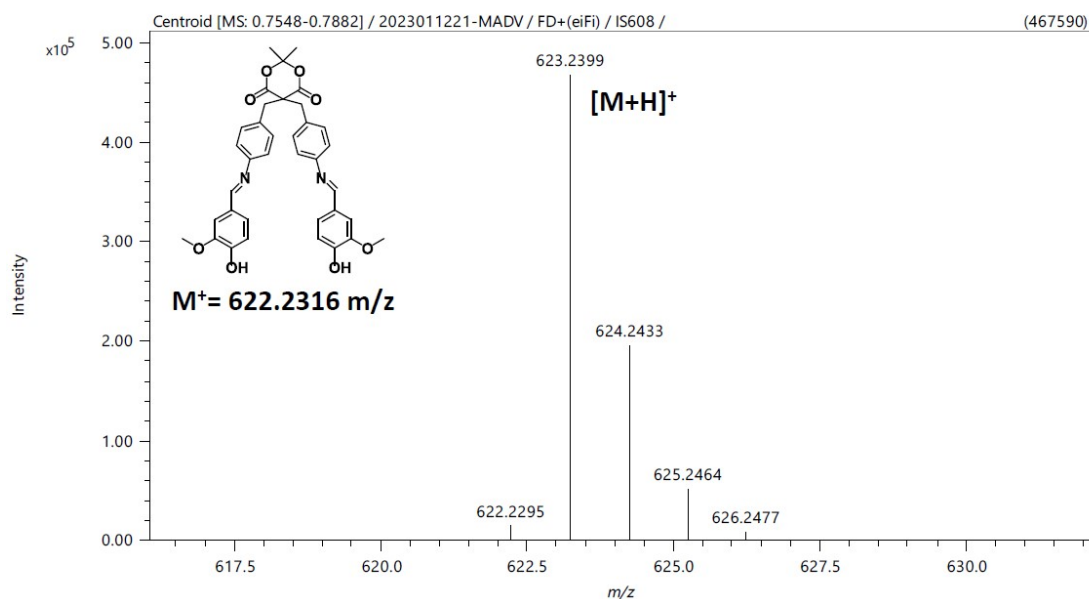

**Figure S1.** Spectral characterization of MADV with (a) FTIR, (b)  $^1\text{H}$  NMR, (c)  $^{13}\text{C}$  NMR, and (d) molecular mass instruments. It is noted that the acetone signals could be from the residual solvent employed in the synthesis and purification processes.

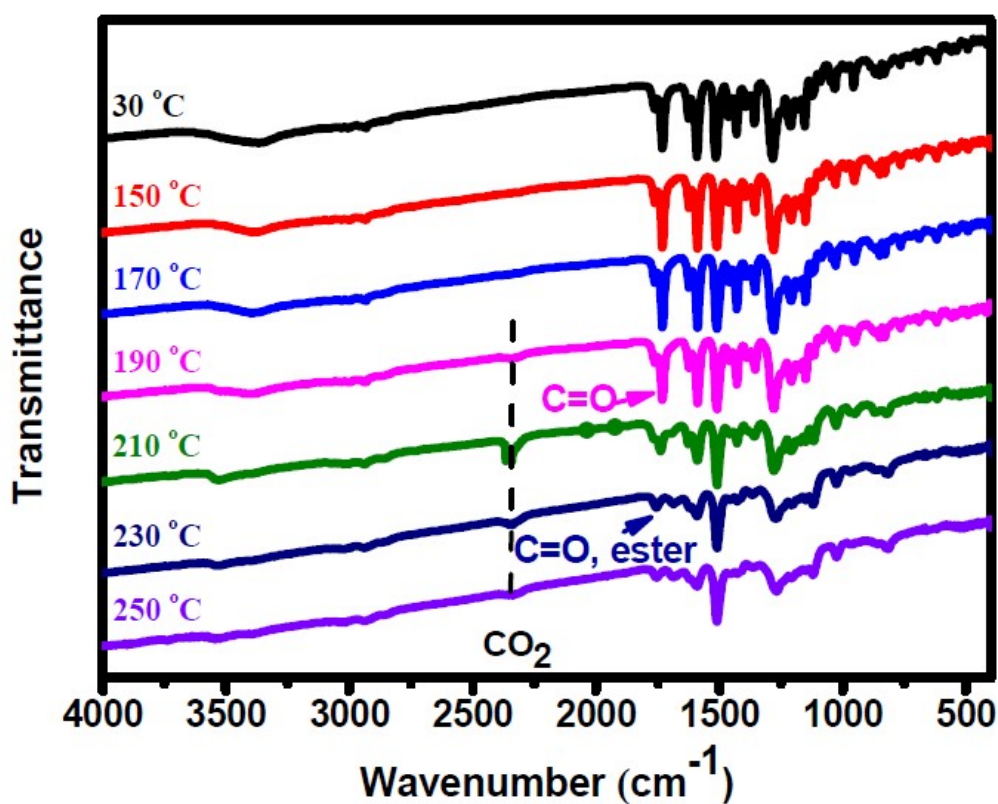

**Figure S2.** FTIR spectra of MADV recorded at different temperatures for tracing the occurrence of MA thermolysis reaction.

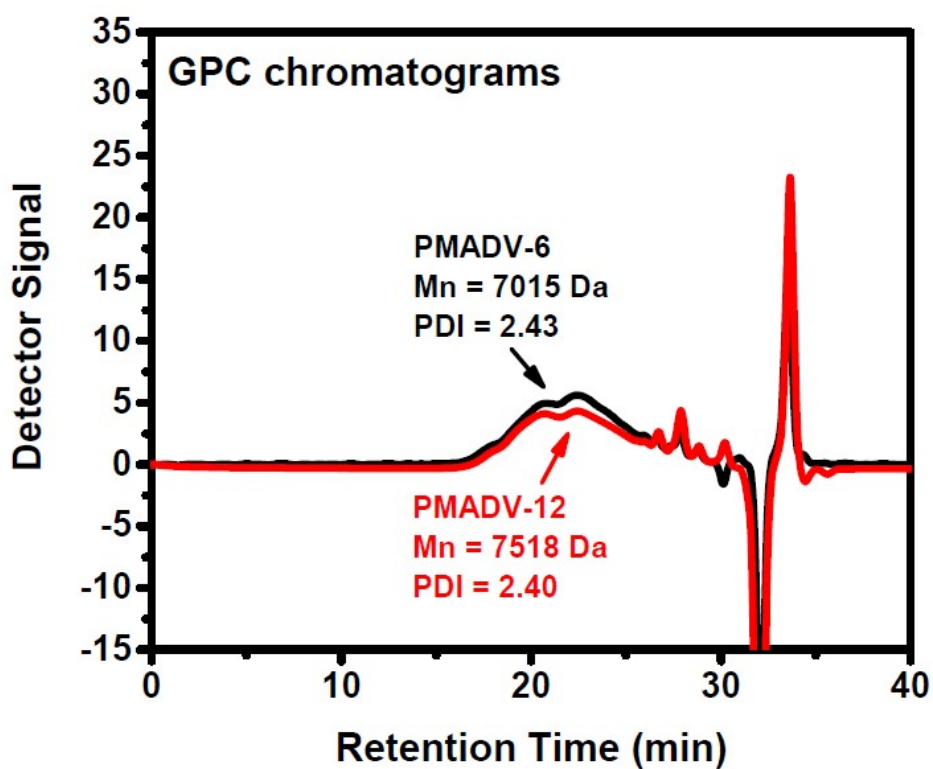

**Figure S3.** GPC chromatograms of PMADV-6 and PMADV-12 for determination their molecular weights.

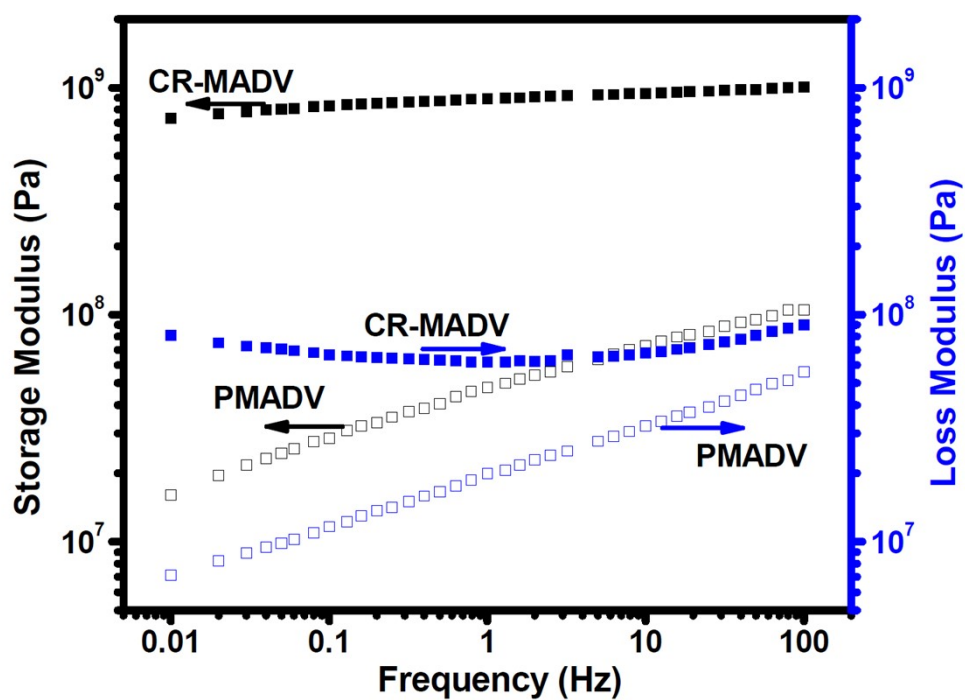

**Figure S4.** Storage modulus and loss modulus of PMADV and CR-MADV recorded at 150 °C and various frequencies.

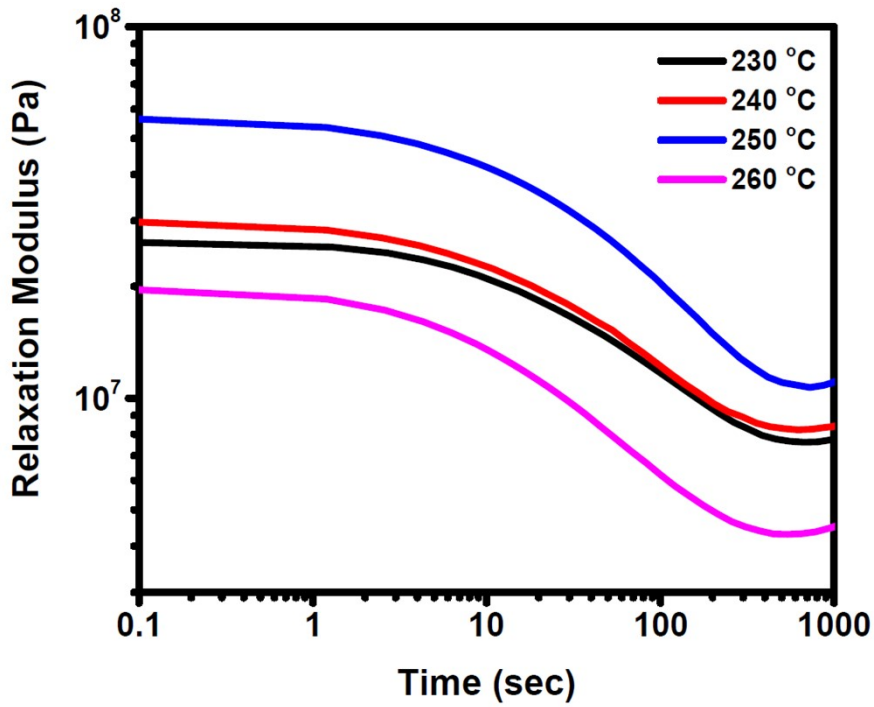

Figure S5. Stress relaxation curves of CR-MADV recorded at various temperatures.

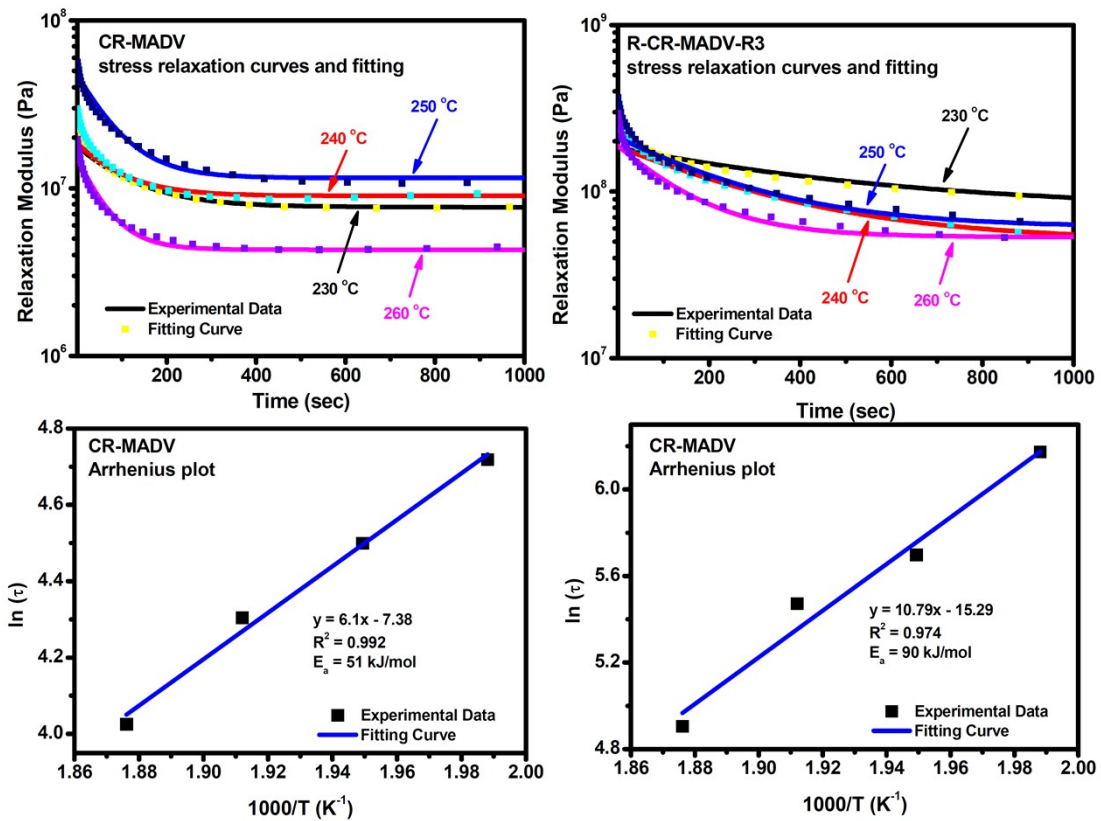

Figure S6. Stress relaxation curves with curve fitting (upper) and Arrhenius plots (lower) of CR-MADV and R-CR-MADV-3.

(a) SEM micrographs tracing the mendable tests of CR-MADV

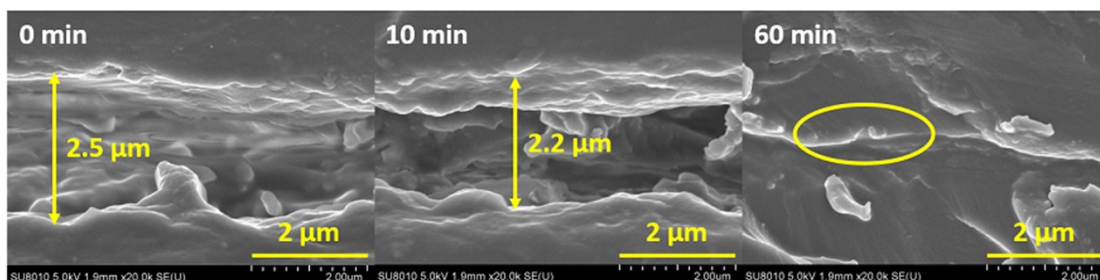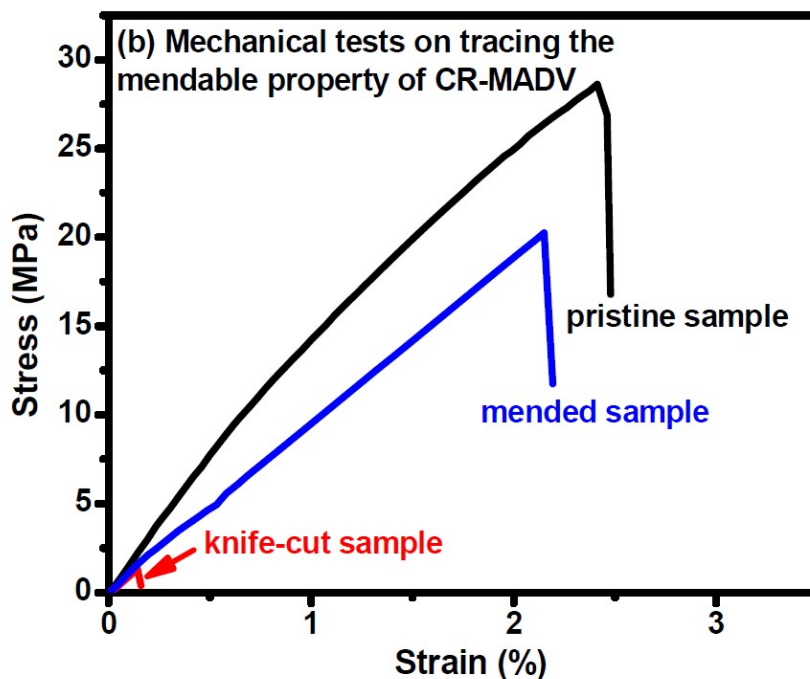

**Figure S7.** (a) SEM micrographs and (b) stress-strain curves tracing the mendable tests of CR-MADV at 230 °C under an applied pressure of about of about 34,000 N m<sup>-2</sup>. The SEM pictures in relatively high magnification exhibiting the mendable cutprint of the sample.

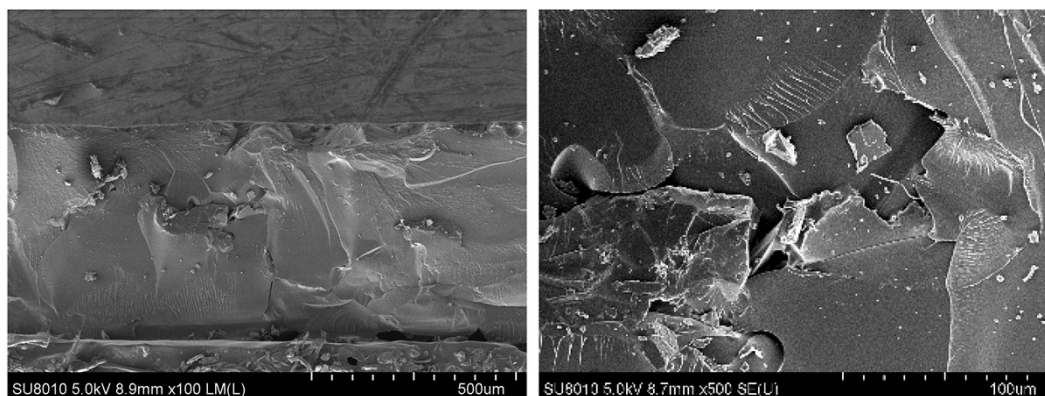

**Figure S8.** SEM micrographs of the recycled sample of CR-MADV obtained from thermal press at 200 °C and 5 MPa for 1 h.

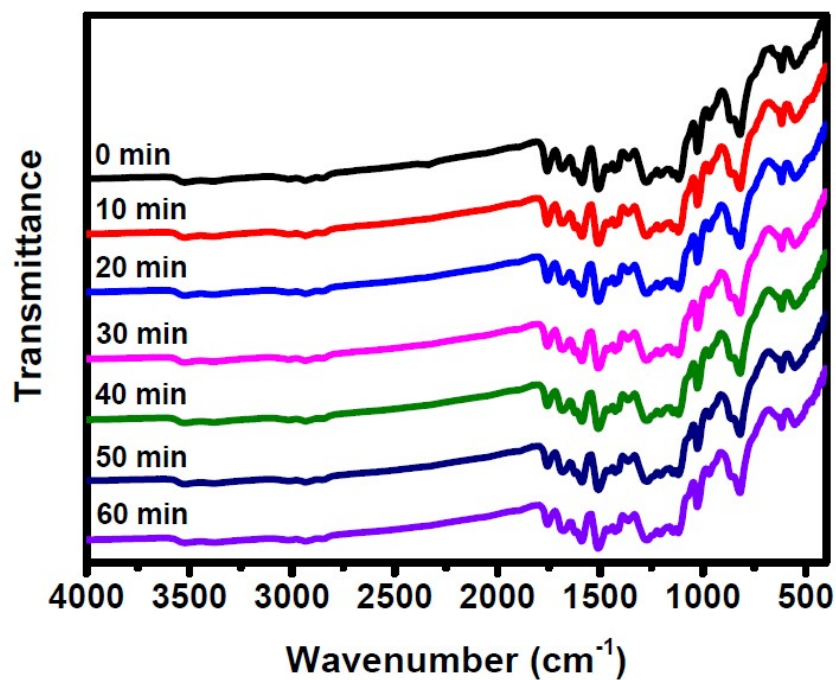

**Figure S9.** FTIR measurements on CR-MADV isothermally at 230 °C, indicating no obvious changes in the chemical structure being observed in the duration of reprocessing.

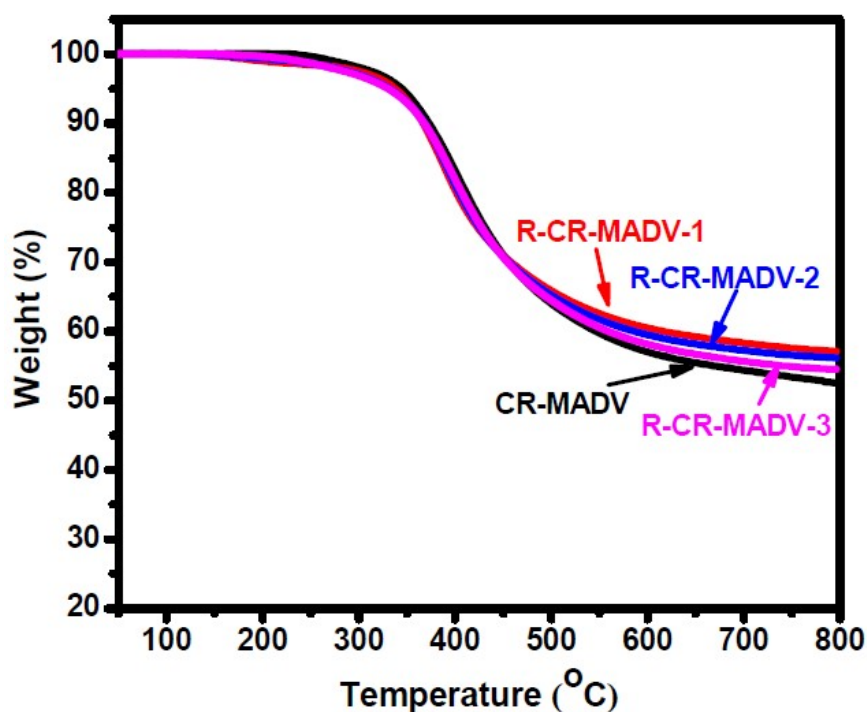

**Figure S10.** TGA thermograms of CR-MADV and the thermally recycled samples (R-CR-MADV), indicating no obvious changes in thermal stability of CR-MADV after being thermally recycled.

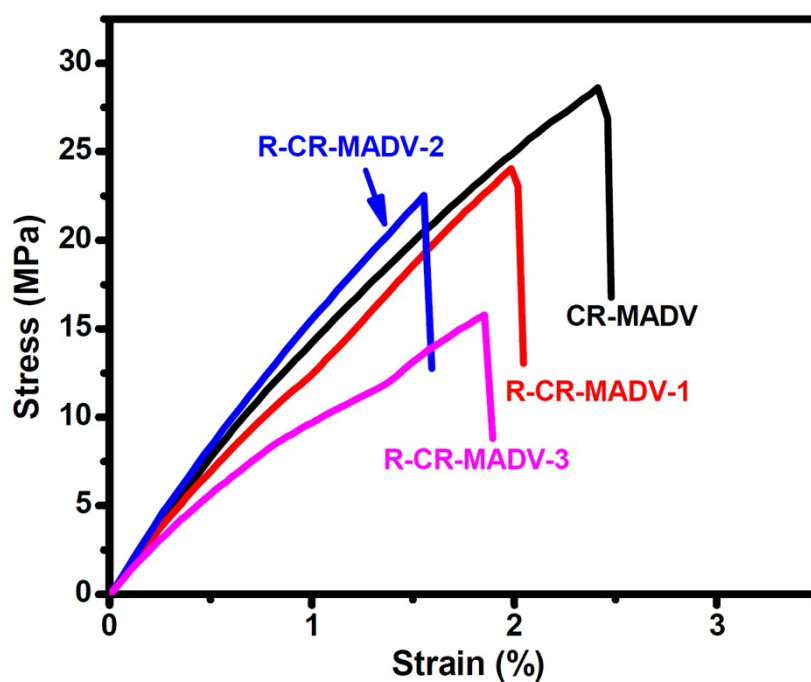

**Figure S11.** Stress-strain curves of CR-MADV and the thermally recycled samples (R-CR-MADV).

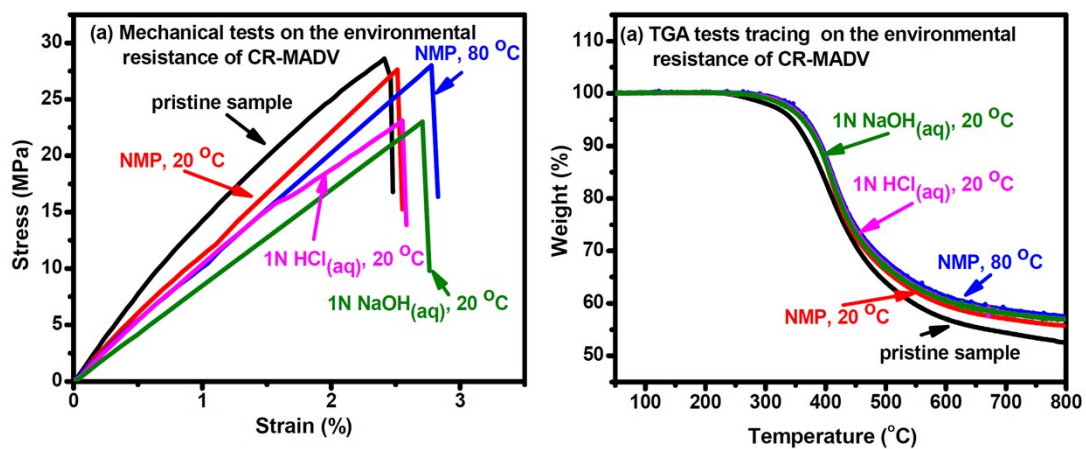

**Figure S12.** (a) Stress-strain curves and (b) TGA thermograms of pristine, solvent- (NMP), acid-, and base-treated CR-MADV samples.



**Table S1.** Mechanical properties of CR-MADV and the thermally recycled samples.

| Sample      | Young's modulus (GPa) | Tensile strength (MPa) | Elongation at break (%) | Recycling efficiency (%) |
|-------------|-----------------------|------------------------|-------------------------|--------------------------|
| CR-MADV     | 1.58                  | 28.6                   | 2.4                     | --                       |
| R-CR-MADV-1 | 1.48                  | 24.0                   | 2.0                     | 84                       |
| R-CR-MADV-2 | 1.78                  | 22.5                   | 1.5                     | 94                       |
| R-CR-MADV-3 | 1.22                  | 15.8                   | 1.8                     | 70                       |

**Table S2.** Gel fractions (%) of CR-MADV and the thermally recycled samples.

| Sample      | Gel fraction (wt%) |                         |                          |
|-------------|--------------------|-------------------------|--------------------------|
|             | NMP                | 1 N HCl <sub>(aq)</sub> | 1 N NaOH <sub>(aq)</sub> |
| CR-MADV     | 99.1               | 97                      | 96.8                     |
| R-CR-MADV-1 | 99.4               | 96.8                    | 98.4                     |
| R-CR-MADV-2 | 98.9               | 96.2                    | 98.4                     |
| R-CR-MADV-3 | 97.8               | 95.2                    | 98.5                     |
